# Supplementary material for: Tumor-infiltrating macrophage associated lncRNA signature in cutaneous melanoma: implications for diagnosis, prognosis, and immunotherapy
Source: Aging (Albany NY). 2024 Mar 13;16(5):4518–40. doi: 10.18632/aging.205606 (PMC10968696; doi:10.18632/aging.205606)
Supplement: Supplementary Figures [file aging-16-205606-s001.pdf]

SUPPLEMENTARY FIGURES

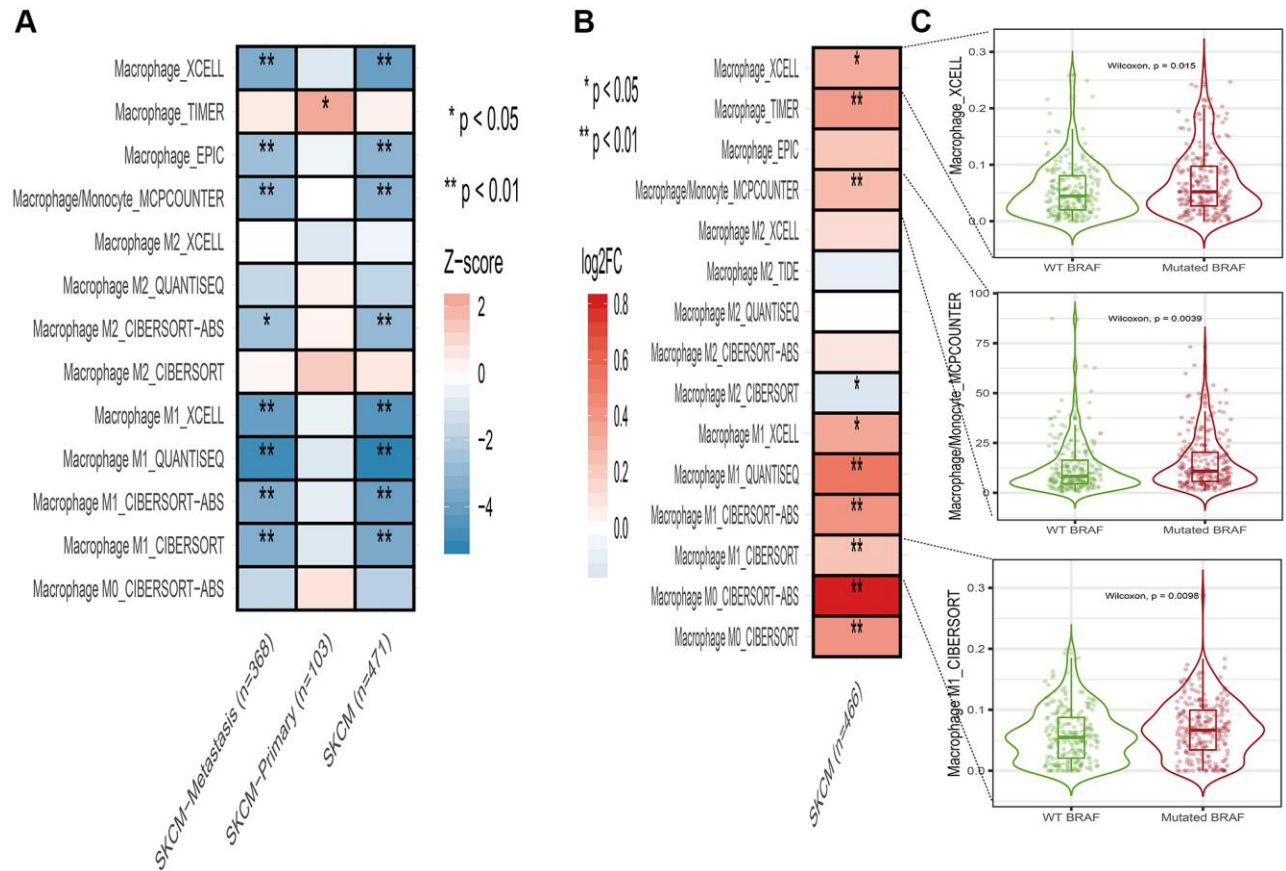

**Supplementary Figure 1. The prognostic value of macrophage in TCGA-SKCM by multiple immune deconvolution methods.** (A) Heatmap of multivariable Cox proportional hazard model for macrophage in TCGA-SKCM datasets. (B) Heatmap of correlation between macrophage and BRAF mutant. (C) Boxplot of macrophage between BRAF mutant and BRAF wildtype.

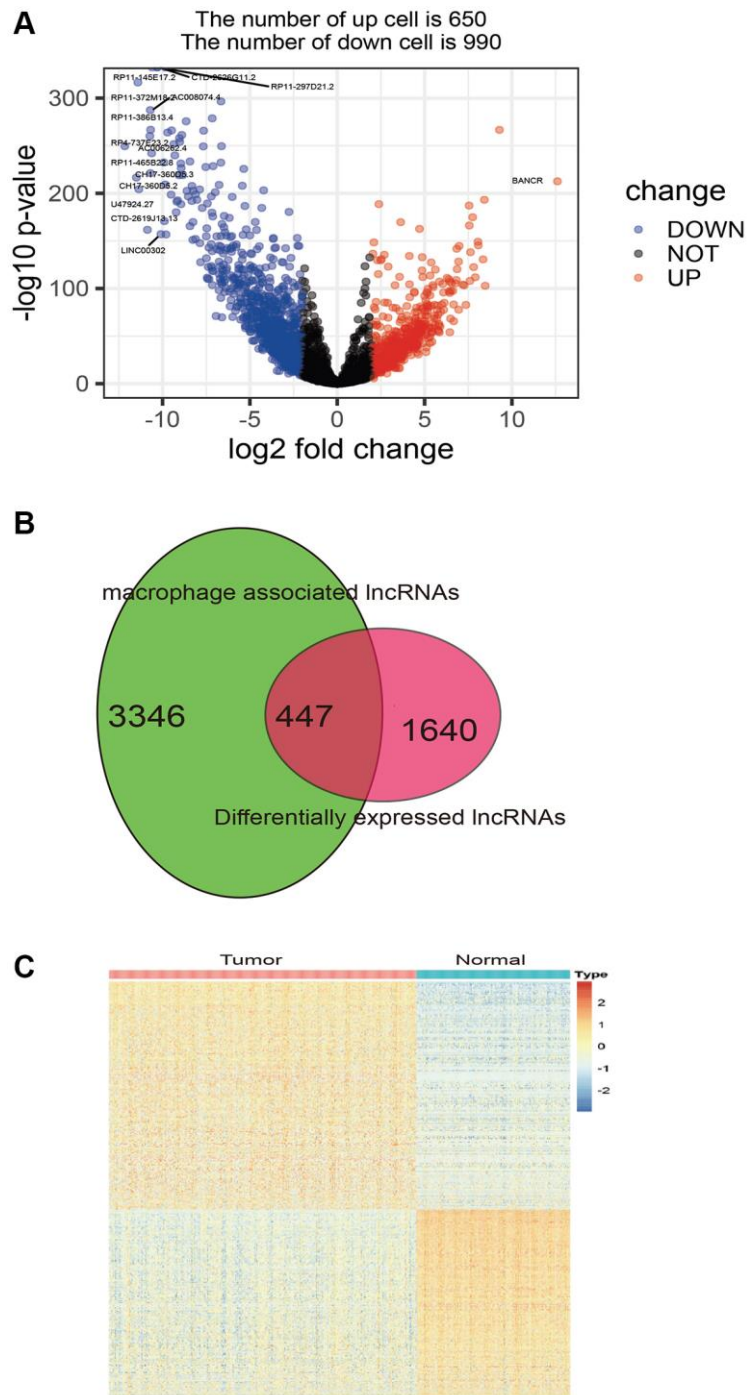

**Supplementary Figure 2. Selection of macrophage associated differentially expressed lncRNAs (DEMlncRNAs).** (A) Volcano plot of differentially expressed lncRNAs between normal and melanoma. The highly differentially expressed lncRNAs were labeled ( $|\text{Log}_2\text{FC}| > 10$ ). (B) The Venn plot of macrophage associated differentially expressed lncRNAs (DEMlncRNAs). (C) Heat map of the DEMlncRNAs in TCGA-SKCM dataset.

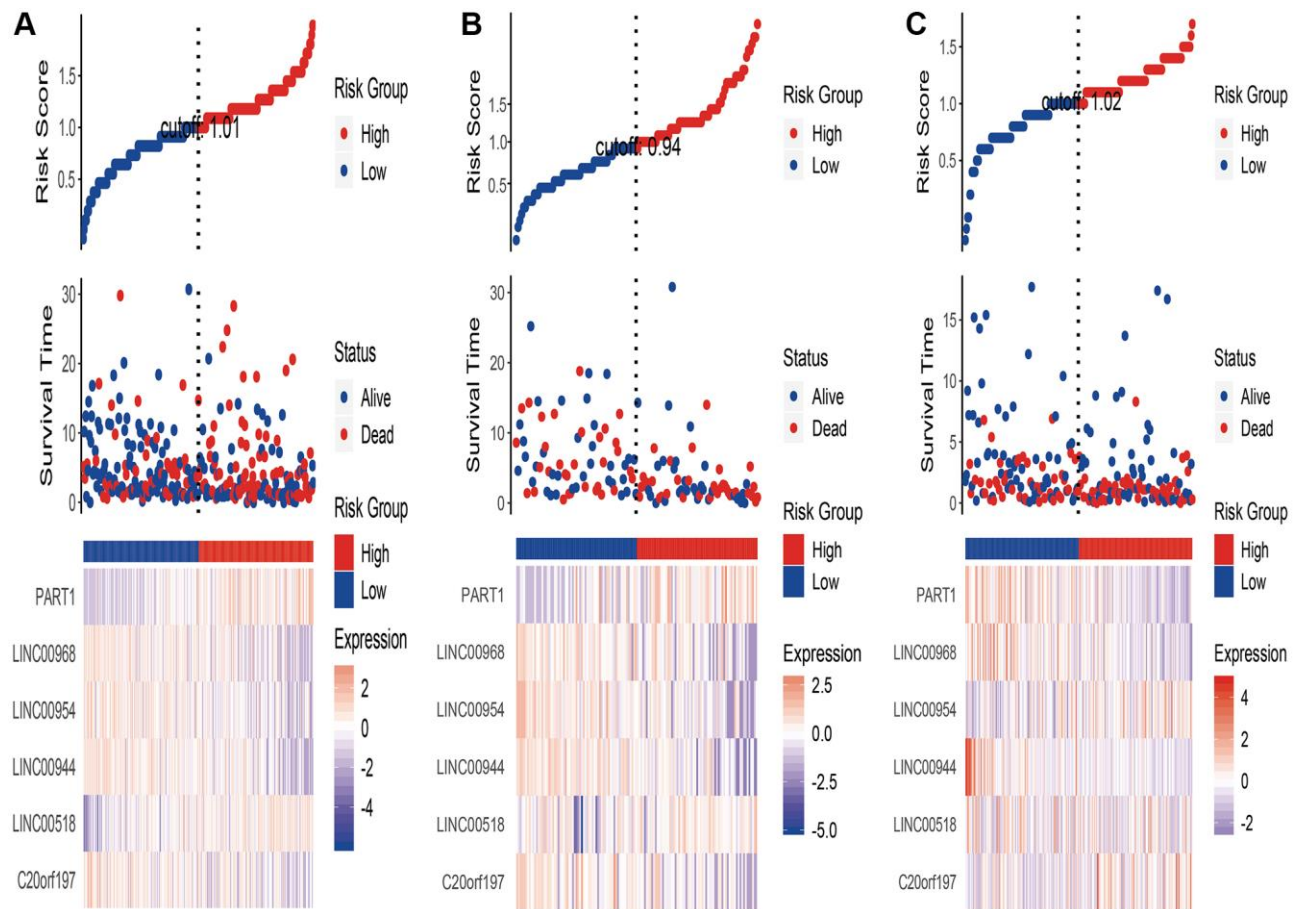

**Supplementary Figure 3. Risk score model.** (A) The risk model in train dataset: the distribution of risk score which are arranged in ascending order from left to right; Overall survival (OS) time and life status; The prognostic lncRNA expression patterns. (B) The risk model in validation dataset: the distribution of risk score which are arranged in ascending order from left to right; Overall survival (OS) time and life status; The prognostic lncRNA expression patterns. (C) The risk model in GSE65904 dataset: the distribution of risk score which are arranged in ascending order from left to right; Overall survival (OS) time and life status; The prognostic lncRNA expression patterns.
